# Supplementary material for: Bandgap engineering strategy through chemical strain and oxygen vacancies in super-tetragonal BiFeO3 epitaxial films
Source: Royal Society of Chemistry journal article supplement (doi:10.1039/d2qi02343a), 2022-12-15
Supplement: d2qi02343a1.pdf [file d2qi02343a1.pdf]

## **Bandgap engineering strategy through chemical strain and oxygen vacancy in super-tetragonal BiFeO<sub>3</sub> epitaxial films**

Jiaqi Ding<sup>1</sup>, Hangren Li<sup>1</sup>, Guoqiang Xi, Jie Tu, Jianjun Tian, Linxing Zhang\*

<sup>1</sup> Institute for Advanced Materials Technology, University of Science and Technology

Beijing, Beijing 100083, China.

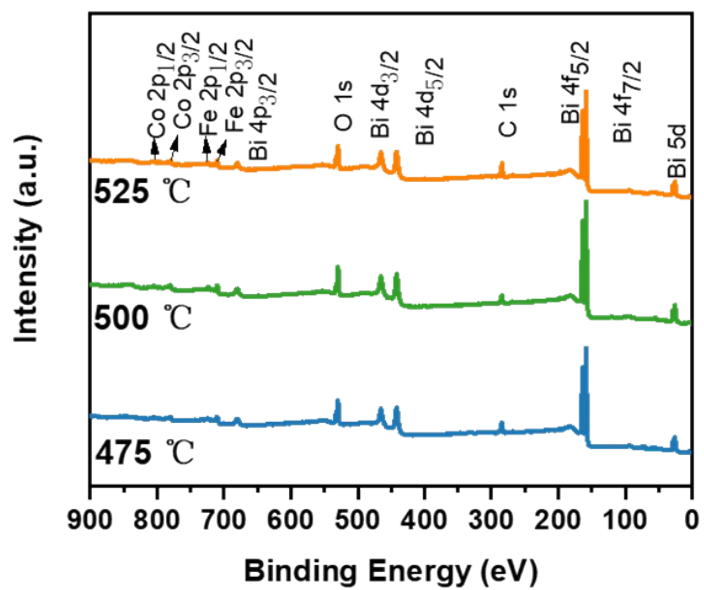

**Figure S1 XPS full spectrum of BFCO<sub>2</sub> films grown at different temperatures on LAO (100) substrates.**

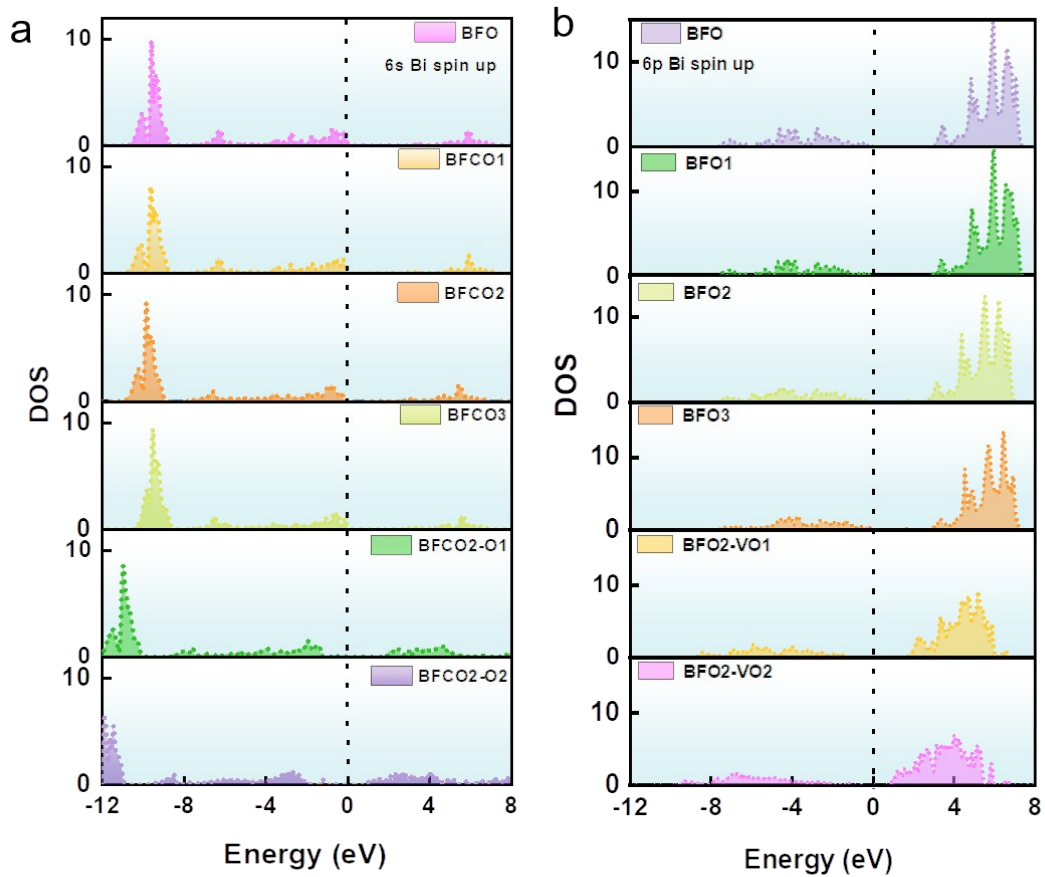

**Figure S2 (a) Bi 6s DOS of  $\text{BiFe}_x\text{Co}_{1-x}\text{O}_3$  and BFO2-Vac( $\text{O}_1$ ) or BFO2-Vac( $\text{O}_2$ ). (b) Bi 6p DOS of  $\text{BiFe}_x\text{Co}_{1-x}\text{O}_3$  and BFO2-Vac( $\text{O}_1$ ) or BFO2-Vac( $\text{O}_2$ ).**

**Table S1 Fe and Co contents of BFCO2 films grown at different temperatures**

| Temperature (°C) | Fe (atom%) | Co (atom%) | Co%    |
|------------------|------------|------------|--------|
| 525              | 8.53       | 3.26       | 27.64% |
| 500              | 5.34       | 3.2        | 37.47% |
| 475              | 6,17       | 4,33       | 41.23% |

**Table S2. Fe<sup>2+</sup> (Fe<sup>3+</sup>), Co<sup>2+</sup> (Co<sup>3+</sup>), and oxygen vacancies contents of BFCO2 films grown at different temperatures**

| Temperature (°C) | Co <sup>2+</sup> : Co <sup>3+</sup><br>(area ratio) | Fe <sup>2+</sup> : Fe <sup>3+</sup><br>(area ratio) | V <sub>ac</sub> : Lat<br>(area ratio) |
|------------------|-----------------------------------------------------|-----------------------------------------------------|---------------------------------------|
| 525              | 0.28                                                | 0.43                                                | 0.11                                  |
| 500              | 0.32                                                | 0.59                                                | 0.13                                  |
| 475              | 0.66                                                | 0.81                                                | 0.24                                  |
